# Supplementary material for: Weakening solvation via dipole interactions enables efficient and stable perovskite solar cells
Source: Royal Society of Chemistry journal article supplement (doi:10.1039/d5ta09417h), 2026-01-01
Supplement: d5ta09417h1.pdf [file d5ta09417h1.pdf]

## **Weakening Solvation via Dipole Interactions Enables Efficient and Stable Perovskite Solar Cells**

Shui Li,<sup>1</sup> Han Qin,<sup>1</sup> Mengnan Zuo,<sup>1</sup> Wangbo Xu, Yingdong Xia,<sup>1</sup> Lingfeng Chao,<sup>1\*</sup>  
Yonghua Chen<sup>1\*</sup>

<sup>1</sup>State Key Laboratory of Flexible Electronics (LoFE) & Institute of Advanced Materials (IAM), School of Flexible Electronics (Future Technologies), Nanjing Tech University (NanjingTech), 30 South Puzhu Road, Nanjing 211816, Jiangsu, China.

\*Corresponding author. Email: [iamlfchao@njtech.edu.cn](mailto:iamlfchao@njtech.edu.cn) (L.C.);  
[iamyhchen@njtech.edu.cn](mailto:iamyhchen@njtech.edu.cn) (Y.C.);

## Experimental Section

### Materials

Fluorine-doped tin oxide (FTO), lead iodide ( $\text{PbI}_2$ ), methylammonium chloride (MACl), bis (trifluoromethane) sulfonimide lithium salt (Li-TFSI, 99.95%), 4-tertbutyl-pyridine (tBP, 99.9%) and Spiro-OMeTAD were purchased from Advanced Election Technology Co., Ltd. Tin oxide ( $\text{SnO}_2$ ) colloid precursor (15% in  $\text{H}_2\text{O}$  colloidal dispersion) was purchased from Alfa Aesar. Formamidinium iodide (FAI, 99.9%) was purchased from Great Cell Solar. Diethyl ether ( $\text{Et}_2\text{O}$ , 99%) was purchased from Yonghua Chemical Co., Ltd. Dimethylformamide (DMF, 99.7%), dimethyl sulfoxide (DMSO), chlorobenzene (CB, 99.7%), isopropanol (IPA, 99.7%), acetonitrile (ACN, 99.9%) and ethanol were purchased from Sigma Aldrich. Unless otherwise noted, all materials were used as received without further modifications.

### Device fabrication

Fluorine-doped tin oxide (FTO) coated glass substrates (purchased from Youxuan Technology Co., Ltd.) were sequentially cleaned with ethanol via ultrasonication, then dried with a nitrogen gun and treated with UV ozone for 20 minutes, respectively. The  $\text{SnO}_2$  aqueous solution (diluted 6 times with deionized water) was spin-coated on the cleaned substrates at 4000 rpm for 30 seconds and then annealed at 150 °C for 30 minutes in ambient air. A 1.7M  $\text{FAPbI}_3$  perovskite precursor solution with 10% excess  $\text{PbI}_2$  was prepared by mixing stoichiometric FAI and  $\text{PbI}_2$ , and MACl in a mixed solvent of DMF and DMF/PAAC (9:1, v/v), which was thoroughly stirred at 20 °C for 6 hours. For perovskite film deposition, 5  $\mu\text{L}$  of precursor solution was blade-coated on FTO/ $\text{SnO}_2$  substrates at 70 mm/s, followed by immediate solvent extraction under a vacuum of 0.1 MPa for 90 s. Thermal annealing was performed using a two-step protocol: initial drying at 70°C for 1 min followed by crystallization at 150°C for 15 min. The hole transport layer (HTL) was deposited by spin-coating at 3,000 rpm. for 30 s using a 0.1 M The

Spiro-OMeTAD (dissolved in CB solution, 72.6 mg/mL) with 28.8  $\mu\text{L}$  of 4-tert-butylpyridine and 17.6  $\mu\text{L}$  of Li-TFSI (dissolved in acetonitrile, 520 mg/mL) was spin-coated at the OAI layer at 2500 rpm for 30 s. Finally, the devices were transferred to a vacuum chamber for the thermal evaporation of  $\text{MoO}_3$  (5 nm) and Ag (100 nm) under a vacuum of  $5 \times 10^{-4}$  Pa.

### **Characterizations**

The ATR-FTIR spectra were measured by a Thermo Fisher IS50 equipped with a reflectance accessory. Proton nuclear magnetic resonance (NMR) spectra were measured with a JOEL NMR spectrometer (JNM-ECZ400S, 400 MHz Japan). Carbon nuclear magnetic resonance (NMR) spectra were measured with a JOEL NMR spectrometer (JNM-ECZ400S, 400 MHz Japan). Dynamic light scattering (DLS) experiments were performed using a Malvern Zetasizer Nano instrument. Zetapotential measurements were performed using a Malvern Zetasizer Nano instrument. Thermal Gravimetric (TG) measurements were performed using a Mettler Toledo TGA 2(SF). Scanning electron microscopy (SEM) analysis was performed on a SU8010 electron microscope. SEM images were captured using a 5-kV acceleration voltage and an aperture size of 20  $\mu\text{m}$ . Grazing-incidence wide-angle X-ray scattering (GIWAXS) was performed at the BL14BL beamline of the Shanghai Synchrotron Radiation Facility (SSRF) using X-ray with a wavelength of 1.24  $\text{\AA}$ . Steady-state photoluminescence (PL) spectra and Time-resolved photoluminescence (TRPL) spectra were obtained by FLS1000. The excitation wavelength was set as 520 nm. The TRPL decay data were modeled by a biexponential formula:  $Y + A_1 \exp(-t/\tau_1) + A_2 \exp(-t/\tau_2)$ . X-ray diffraction (XRD) patterns were performed using  $\text{Cu K}\alpha$  radiation as the X-ray source by a Smart Lab diffractometer from Japan. Photo current-voltage (J-V) curves were measured by using 2400 Series Source Meter (Keithley Instruments) under a SS-F5-3A solar simulator (AM 1.5G, 100  $\text{mW cm}^{-2}$ ) (Enlitech) calibrated by a NREL standard Si cell, and no additional UV filter equipment was used.

### **Space charge limited current (SCLC) analysis**

The structure of a single charge-carrier device is FTO/SnO<sub>2</sub>/FAPbI<sub>3</sub>/PC<sub>61</sub>BM/ C<sub>60</sub>/BCP/Ag. The trap density of the perovskite film is calculated with the formula of equation (1)

$$n_{trap} = 2\varepsilon_0\varepsilon V_{TFL}/(qL^2) \quad (1)$$

where  $\varepsilon_0$  is the vacuum permittivity,  $\varepsilon$  is the relative dielectric constant of perovskite film (46.9 for FAPbI<sub>3</sub>),  $q$  is the elemental charge and  $L$  is the thickness of the perovskite layer.

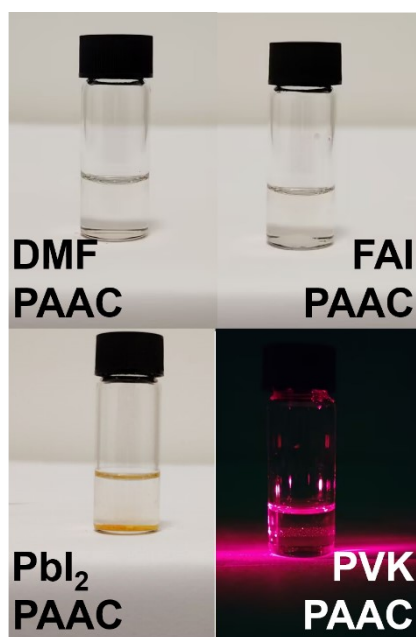

**Supplementary Fig. 1** Photograph of the FAI, PbI<sub>2</sub>, DMF and perovskite precursor solution with Pentyl propionate.

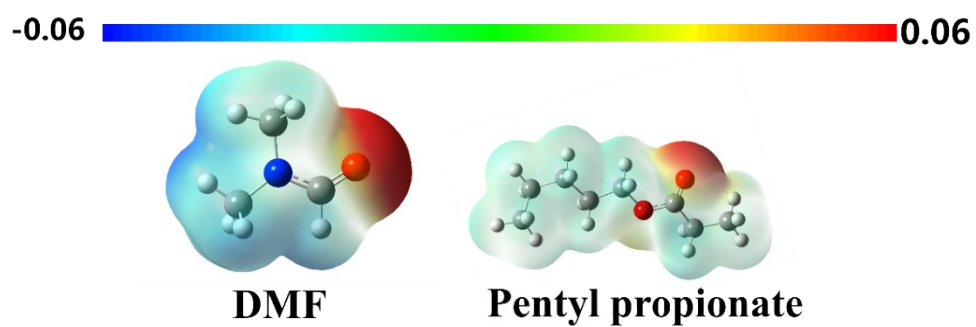

**Supplementary Fig. 2** The ESP mapping of DMF and Pentyl propionate.

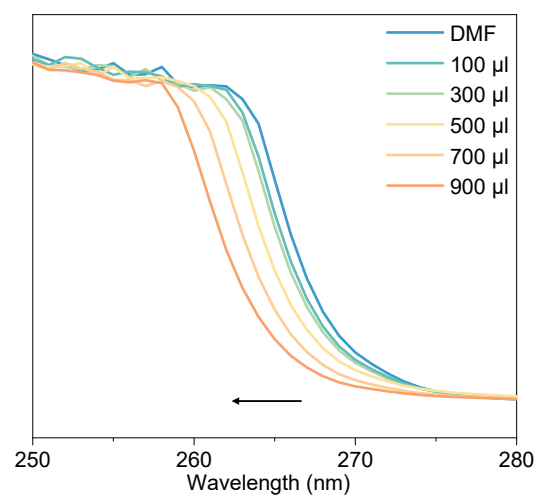

**Supplementary Fig. 3** UV-vis spectra of DMF with different contents of Pentyl propionate.

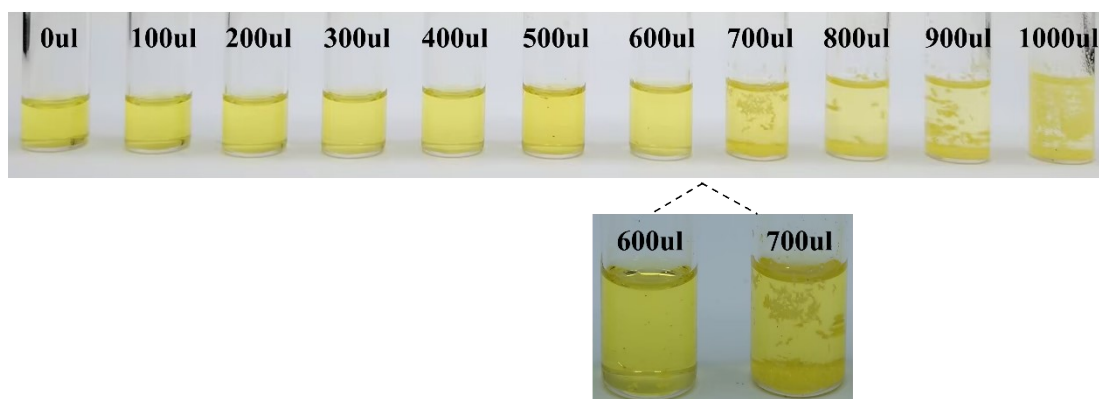

**Supplementary Fig. 4** Photograph of adding 1ml pentyl propionate into 1 ml DMF solution of  $\text{PbI}_2$  in 100 $\mu\text{l}$  increments starting from 0 $\mu\text{l}$ .



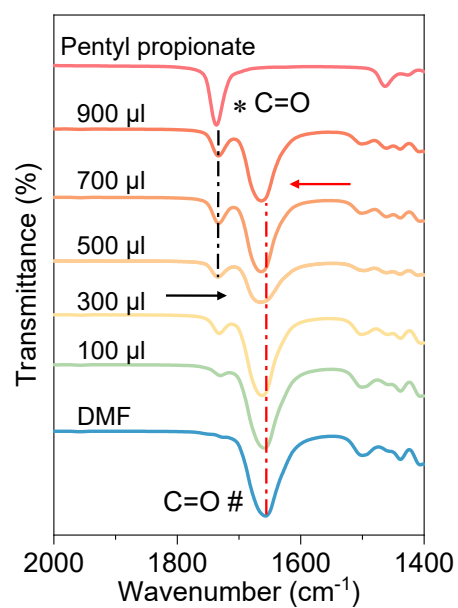

**Supplementary Fig.5** FTIR spectra of the C=O of the solution of DMF with different contents of Pentyl propionate.

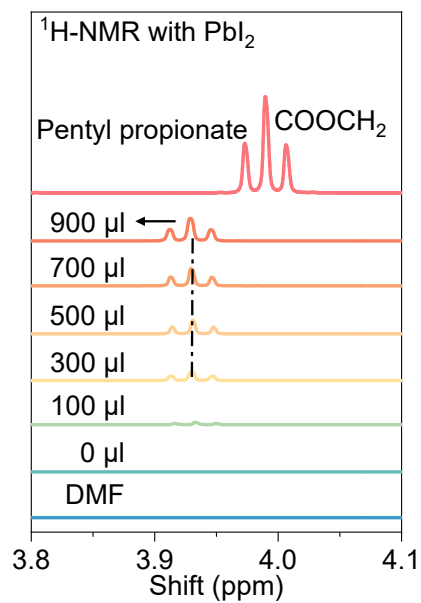

**Supplementary Fig.6** <sup>1</sup>H-NMR spectra of COOCH<sub>2</sub> the solution of PbI<sub>2</sub> dissolved in DMF with different contents of Pentyl propionate.

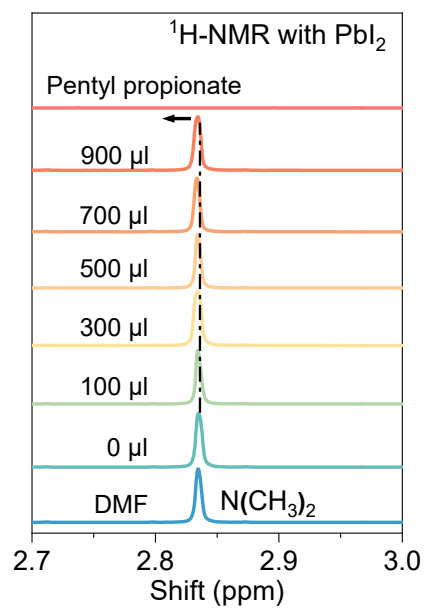

**Supplementary Fig. 7** <sup>1</sup>H-NMR spectra of the protons of N(CH<sub>3</sub>)<sub>2</sub> of PbI<sub>2</sub> dissolved in DMF with different contents of Pentyl propionate.

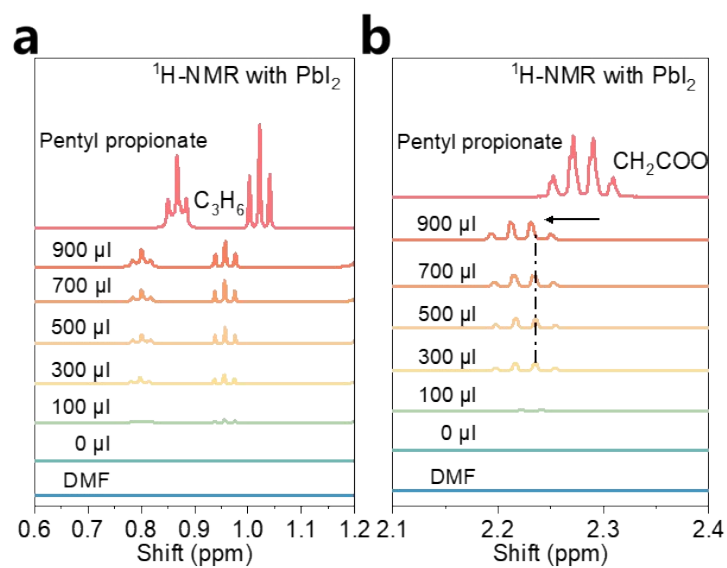

**Supplementary Fig. 8** (a) <sup>1</sup>H-NMR spectra of the protons of C<sub>3</sub>H<sub>6</sub> of PbI<sub>2</sub> dissolved in DMF with different contents of Pentyl propionate. (b) <sup>1</sup>H-NMR spectra of the protons of CH<sub>2</sub>COO of PbI<sub>2</sub> dissolved in DMF with different contents of Pentyl propionate.

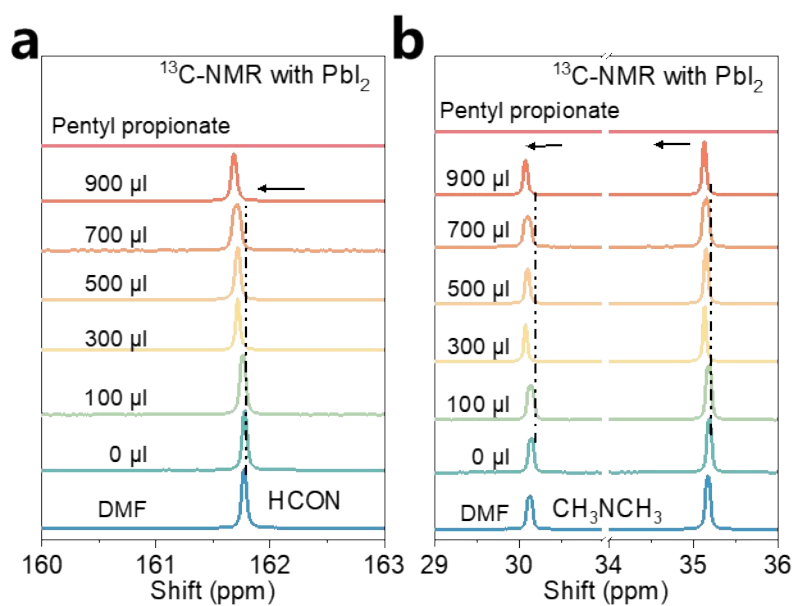

**Supplementary Fig. 9 (a)**  $^{13}\text{C}$ -NMR spectra of the C proton of the amide group HCON of  $\text{PbI}_2$  dissolved in DMF with different contents of Pentyl propionate. **(b)**  $^{13}\text{C}$ -NMR spectra of the C proton of the amide group  $\text{N}(\text{CH}_3)_2$  of  $\text{PbI}_2$  dissolved in DMF with different contents of Pentyl propionate.

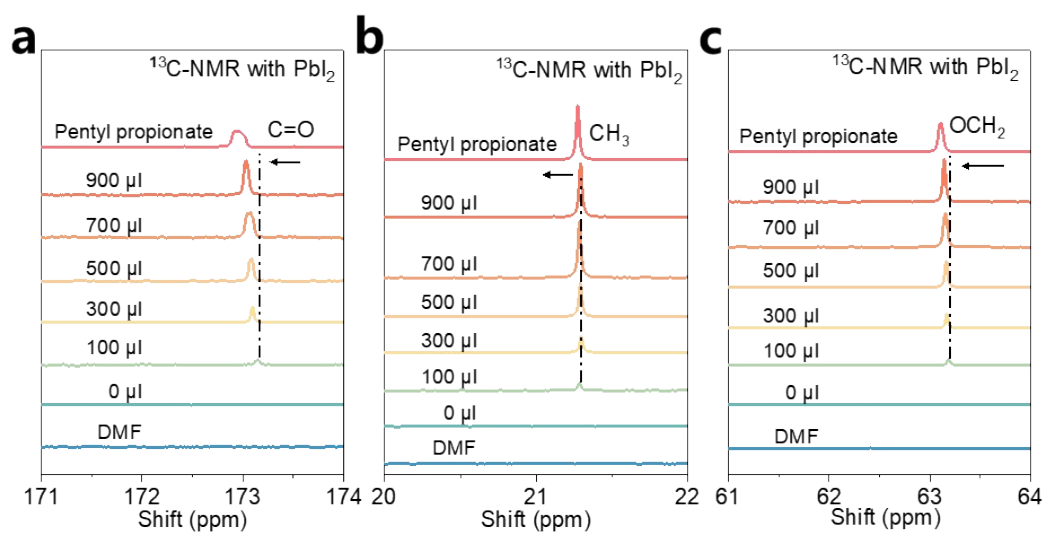

**Supplementary Fig. 10** (a)  $^{13}\text{C}$ -NMR spectra of the C proton of the amide group COOH of  $\text{PbI}_2$  dissolved in DMF with different contents of Pentyl propionate. (b)  $^{13}\text{C}$ -NMR spectra of the C proton of the  $\text{CH}_3$  of  $\text{PbI}_2$  dissolved in DMF with different contents of Pentyl propionate. (c)  $^{13}\text{C}$ -NMR spectra of the C proton of the  $\text{OCH}_2$  of  $\text{PbI}_2$  dissolved in DMF with different contents of Pentyl propionate.

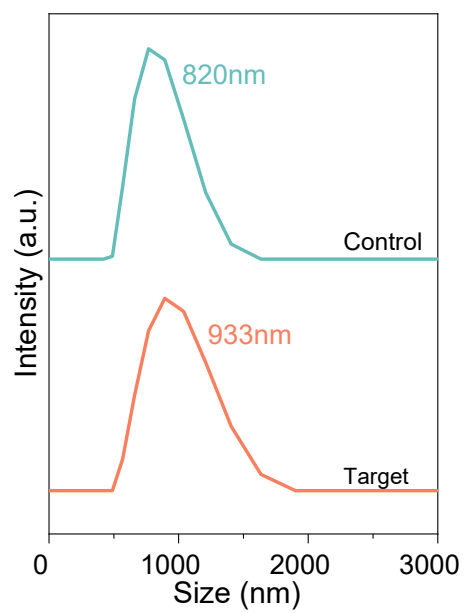

**Supplementary Fig. 11** Dynamic Light Scattering (DLS) of the DMF perovskite precursor solution and the PAAC /DMF perovskite precursor solution.

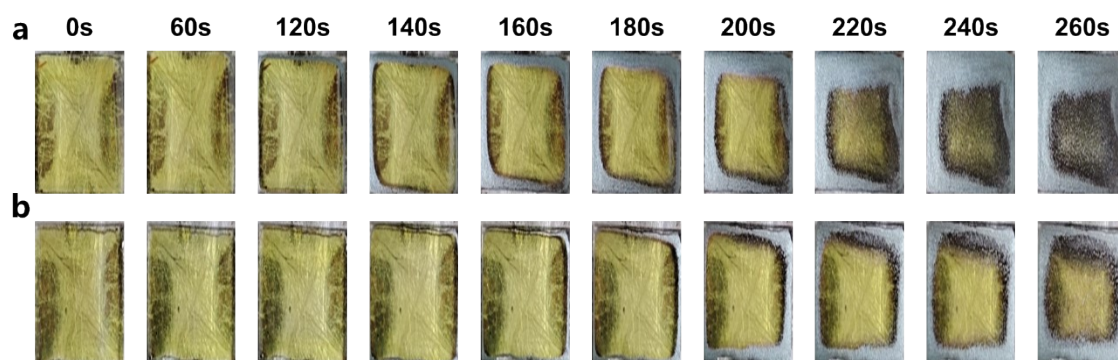

**Supplementary Fig. 12** Photograph of the phase transformation of time under constant temperature for (a) the control and (b) the target film.



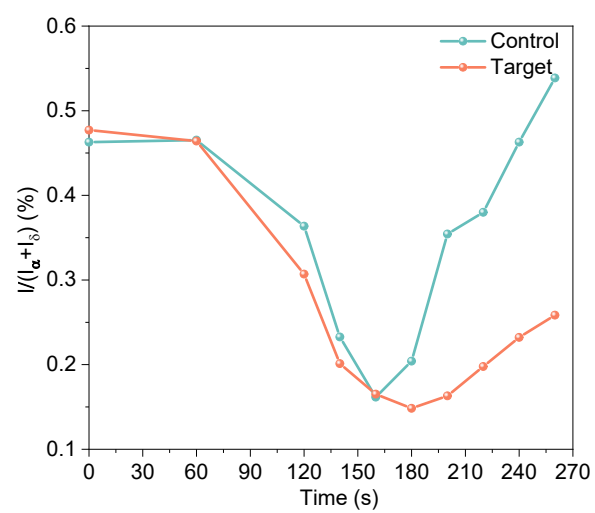

**Supplementary Fig. 13** The relative intensity of the  $\alpha$ -FAPbI<sub>3</sub> XRD diffraction peak.

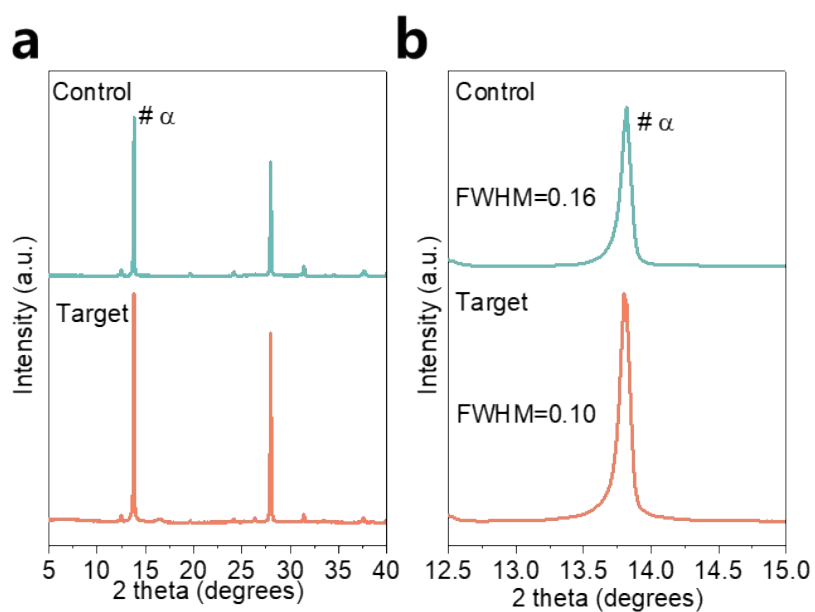

**Supplementary Fig. 14 (a)** The XRD patterns of control film and target film. **(b)** The half-peak width (FWHM) of the XRD patterns of  $\alpha$ -FAPbI<sub>3</sub> of control film and target film.

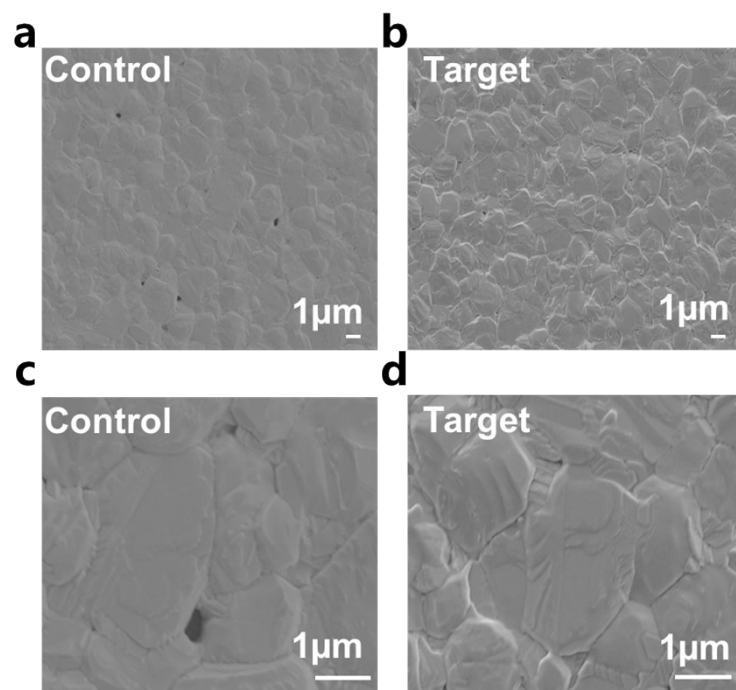

**Supplementary Fig. 15** SEM images of **(a)** the control film and **(b)** the target film in 5000 SEM images of **(c)**the control film and **(d)** the target film in 20000.

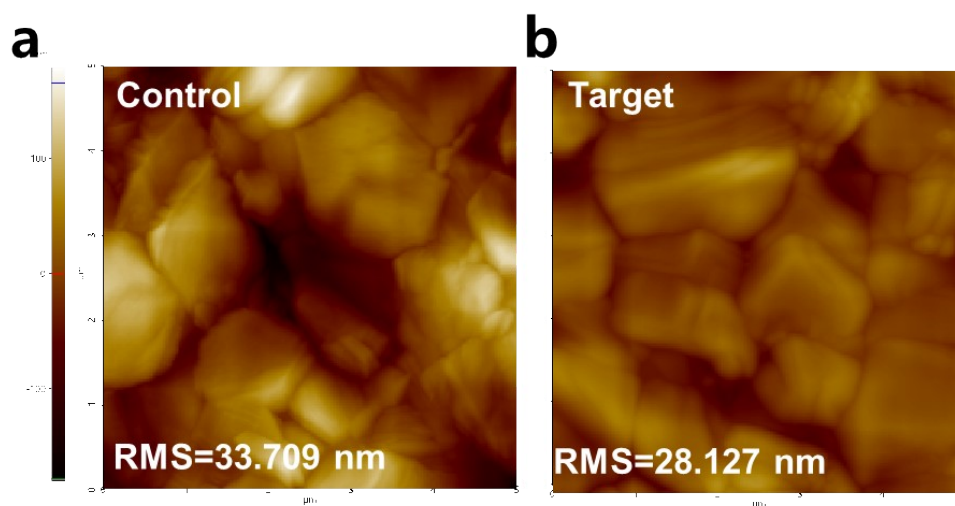

**Supplementary Fig. 16 (a)** AFM images of the control film **(b)** AFM images of the target film.

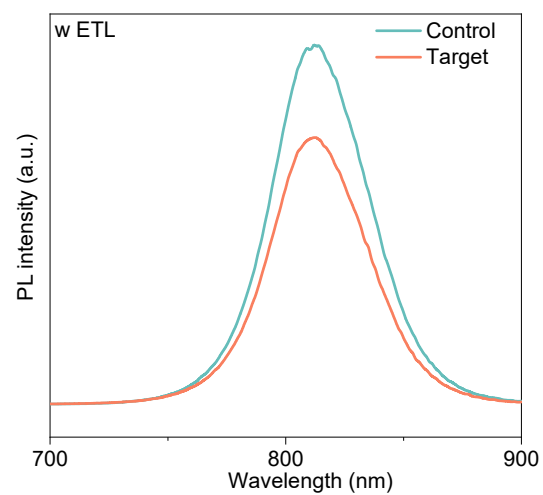

**Supplementary Fig. 17** PL of the control film and the target film with ETL.

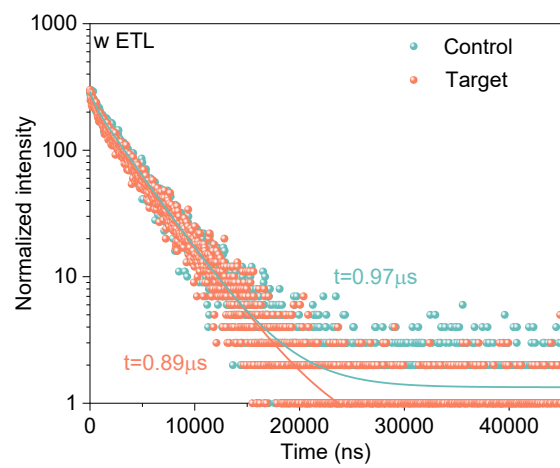

**Supplementary Fig. 18** TRPL of the control film and the target film with ETL.

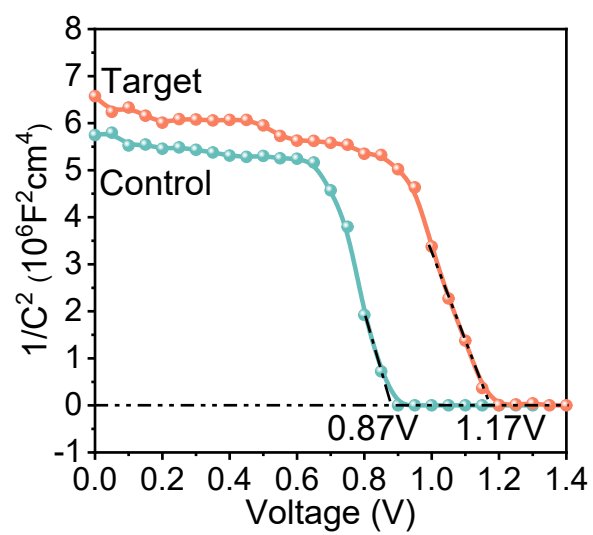

**Supplementary Fig. 19** Mott-Schottky curve of control and target PSCs.

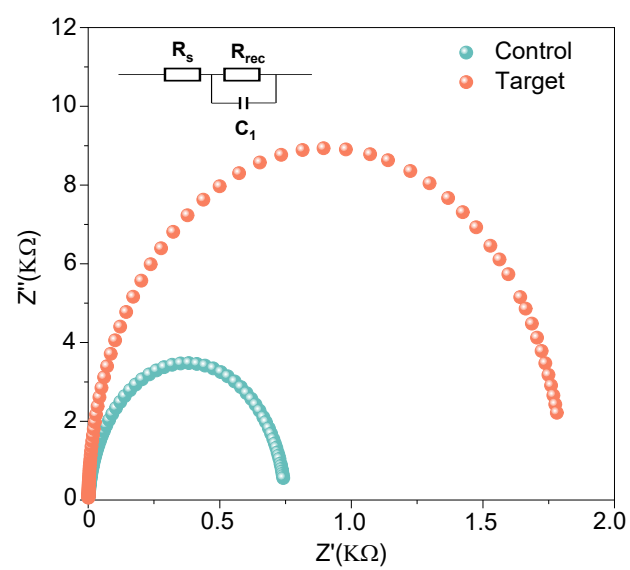

**Supplementary Fig. 20** EIS of the control device and the target device.



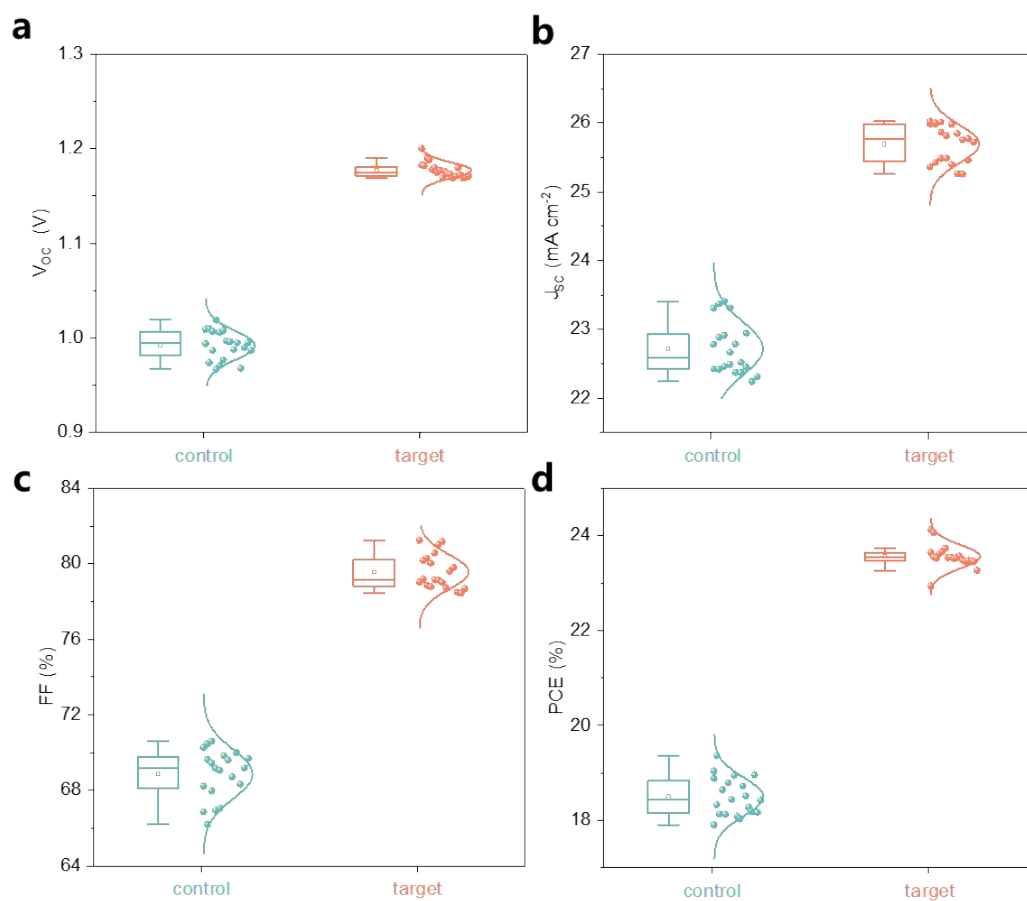

**Supplementary Fig. 21** (a)  $V_{oc}$ , (b)  $J_{sc}$ , (c) FF and (d) PCE distributions of control and target PSCs. The number of devices for each type is 20. The average  $V_{oc}$  of control PSCs is 0.99 V and target PSCs is 1.17 V.

**Table S1.** Detailed parameters of large-area module ( $5 \times 5 \text{ cm}^2$ ) (area =  $12.6 \text{ cm}^2$ , number of sub-cells=6)

| <b>Sample</b>  | <b>V<sub>oc</sub> (V)</b> | <b>J<sub>sc</sub> (mA/cm<sup>2</sup>)</b> | <b>FF (%)</b> | <b>PCE (%)</b> |
|----------------|---------------------------|-------------------------------------------|---------------|----------------|
| <b>Control</b> | 5.93                      | 3.93                                      | 56.5          | 13.17          |
| <b>Target</b>  | 6.75                      | 3.84                                      | 77.16         | 20.06          |
